# Supplementary material for: Cross-platform clinical proteomics using the Charité open standard for plasma proteomics (OSPP)
Source: Springer Nature journal article supplement (doi:10.1038/s41467-025-67264-9), 2025-12-22
Supplement: MOESM2 [file 41467_2025_67264_MOESM2_ESM.pdf › 41467_2025_67264_MOESM2_ESM.pdf]

## Description of Additional Supplementary Files

File Name: Supplementary Data 1

Description:

peptide selection parameters, properties and analytical performance

| Sheet name                      | Description                                                                                                                                                                     |
|---------------------------------|---------------------------------------------------------------------------------------------------------------------------------------------------------------------------------|
| selection cohort                | Cohort description for peptide selection                                                                                                                                        |
| peptide properties              | peptide selection parameters, properties, analytical performance and matrix test detection                                                                                      |
| Peptide quantities in different | pairwise Wilcoxon signed-rank tests for each peptide in every two blood matrices                                                                                                |
| pairwise Wilcoxon signed-rank t | pairwise Wilcoxon signed-rank tests for each peptide in every two blood matrices                                                                                                |
| CV_compare with PQ500_peptide   | coefficient of variation in percentage (sd/mean) of each peptide (Precursor.Normalised) calculated from triplicate measurements of pooled plasma on micro-flow attached ZenoTOF |
| CV_compare with PQ500_protein   | coefficient of variation in percentage (sd/mean) of each protein (MaxLFQ) calculated from triplicate measurements of pooled plasma on micro-flow attached ZenoTOF               |
| PXD036594_ourput                | DIA-NN ourput of PXD036594 (using OSPP pipline, filtered for OSPP/ PQ500 peptides)                                                                                              |
| PXD036594_CV_compare with PQ500 | coefficient of variation in percentage (sd/mean) of each peptide (Precursor.Normalised) calculated from PXD036594                                                               |

File Name: Supplementary Data 2

Description:

amount of each isotopic labeled peptide in 1µl of the concentration -matched OSPP mixture

| Sheet name | Description                                                                               |
|------------|-------------------------------------------------------------------------------------------|
| Sheet 1    | amount of each isotopic labeled peptide in 1µl of the concentration -matched OSPP mixture |

File Name: Supplementary Data 3

Description:

calibration curves & LOQs

| Sheet name                       | Description                                                                                                     |
|----------------------------------|-----------------------------------------------------------------------------------------------------------------|
| Preparation of Calibration curve | Preparation of Calibration curves, methods and concentration used                                               |
| LOD,LOQ                          | Summary of limit of detection and quantification and fitted linear regression formula (slope, intercept and R2) |

File Name: Supplementary Data 4

Description:

metadata for the manuscript

| Sheet name                      | Description                                                                                                                            |
|---------------------------------|----------------------------------------------------------------------------------------------------------------------------------------|
| metadata for 4 matrices         | metadata for healthy individual cohort with 4 matrices                                                                                 |
| meta data for study cohort      | Metadata for the COVID-19 plasma cohort.                                                                                               |
| WHO score & Severity            | WHO score and severity description                                                                                                     |
| metadata for exploris480 sample | Sample name reference for measurement on Exploris 480 (data match for nthermo-MS1 & -MS2)                                              |
| Composite dataset               | Composite dataset, in each severity group, randomly select data acquired from different LC-MS platforms and make the composite dataset |

File Name: Supplementary Data 5

Description:

COVID-19 cohort\_ MRMHR data

| Sheet name                        | Description                                                                                                                                                        |
|-----------------------------------|--------------------------------------------------------------------------------------------------------------------------------------------------------------------|
| fragment used for quantification  | Fragment used for quantification in MRM-HR                                                                                                                         |
| Kendall's Tau trend test_WHO      | Statistical analysis of each peptide . two-sided Kendall's Tau trend test between peptide quantities and COVID19 treatment escalation score (WHO 0, 3, 4, 5, 6, 7) |
| Kendall's Tau trend test_Severity | Statistical analysis of each peptide . Kendall's Tau trend test between peptide quantities and COVID-19 severity (healthy, mild,severe,critical)                   |

File Name: Supplementary Data 6

Description:

fragment distribution, CV, sample fold change, R2, slope and Statistical analysis of each peptide acquired from MRMHR and ZenoSWATH-DIA data.

| Sheet name                    | Description                                                                                                                                                                                                                                      |
|-------------------------------|--------------------------------------------------------------------------------------------------------------------------------------------------------------------------------------------------------------------------------------------------|
| Fragment distribution         | distribution of each fragment (% compared to all fragment in the respective precursor) in each LC-MS platform                                                                                                                                    |
| foldchange                    | fold change of peptide quantities of DIA (uZSWATH) generated from DIA-NN software to that of MRM-HR generated by skyline, calculated by uZSWATH quantities / MRMHR quantities (norm_light: median normalised value; ratio: ratio (light / OSPP)) |
| CV for studypools (MADmedian) | coefficient of variation (MAD/median) in percentage of each peptide calculated from quintuplicates of study pools on both acquisition methods                                                                                                    |
| CV for studypools (SDmean)    | coefficient of variation (SD/mean) in percentage of each peptide calculated from quintuplicates of study pools on both acquisition methods                                                                                                       |
| R2-slope                      | Correlation of each peptide calculated from linear model( $y \sim x$ ) of MRM-HR to ZenoSWATH-DIA (R2 and slope)                                                                                                                                 |
| Kendall's Tau trend_WHO       | Statistical analysis of each peptide in both MS methods . two-sided Kendall's Tau trend test between peptide quantities and COVID19 treatment escalation score (WHO 0, 3, 4, 5, 6, 7)                                                            |
| Kendall's Tau trend Severity  | Statistical analysis of each peptide . Kendall's Tau trend test between peptide quantities and COVID-19 severity (healthy, mild,severe,critical)                                                                                                 |

File Name: Supplementary Data 7

Description:

OSPP peptide detection, RT, fragment distribution, CV, and Statistical analysis of each peptide acquired from all DIA platforms

| Sheet name                      | Description                                                                                                                                                                         |
|---------------------------------|-------------------------------------------------------------------------------------------------------------------------------------------------------------------------------------|
| Detection of peptide in certain | Peptide detection in each WHO severity group under each acquisition platforms, numbers shown are the number of sample within each severity groups                                   |
| Retention time of each sample   | Retention time of each precursor and the difference between light and OSPP in all sample in each platforms                                                                          |
| RT differnece between light & O | Retention time cv and range of both light and OSPP (heavy) peptides                                                                                                                 |
| Fragment distribution           | distribution of fragment (% among all fragments in respective precursor) of each peptide in each platform                                                                           |
| icc fragment percentage of all  | The resulting output data file is a structured table summarizing measurement variability and reproducibility metrics for every precursor–fragment–label combination in the dataset. |
| correlation between peptides fr | R2 of peptides from same protein in different DIA platform calculated from linear model( $y \sim x$ )                                                                               |
| Precurs used for quantificaiton | Precursor used for quantification in each LC-MS platforms                                                                                                                           |
| CV for studypools(MADmedian)    | coefficient of variation (MAD/median) in percentage of each peptide calculated from quintuplicates of study pools on all platforms                                                  |
| CV for studypools(SDmean)       | coefficient of variation (SD/mean) in percentage of each peptide calculated from quintuplicates of study pools on all platforms                                                     |
| CV for all samples(MAdmedian)   | coefficient of variation (MAD/median) in percentage of each peptide calculated from clinical samples on all platforms                                                               |
| CV for all samples(SDmean)      | coefficient of variation (SD/mean) in percentage of each peptide calculated from clinical samples on all platforms                                                                  |
| variance partitioning across pe | Variance Partitioning of Peptide-Level Expression (ratio: OSPP normalised and norm_light: median normalised peptide quantities) Across MS Platform and Disease Severity             |

|                                 |                                                                                                                                                                                                                |
|---------------------------------|----------------------------------------------------------------------------------------------------------------------------------------------------------------------------------------------------------------|
| Kendall's Tau trend test_WHO    | Statistical analysis of each peptide in each platform . two-sided Kendall's Tau trend test between peptide quantities and COVID19 treatment escalation score (WHO 0, 3, 4, 5, 6, 7)                            |
| Kendall's Tau trend test_Severi | Statistical analysis of each peptide . two-sided Kendall's Tau trend test between peptide quantities and COVID-19 severity (healthy, mild, severe, critical)                                                   |
| composite dataset composition   | Samples contribute to composite dataset                                                                                                                                                                        |
| Statistics_composite dataset    | Statistical analysis of each peptide in both ZT Scan DIA dataset and composite dataset . two-sided Kendall's Tau trend test between peptide quantities and COVID-19 severity (healthy, mild, severe, critical) |
| bland-altman output             | bland-altman output for comparing hZsSWATH to "composite dataset"                                                                                                                                              |
